# Supplementary material
Source: PubMed Central journal article supplement (PMC6335900)
Supplement: tpmd180577.SD1.pdf [file tpmd180577.SD1.pdf]

Table S1: Baseline characteristics of Malawi cohort

|                                              | <b>Total<br/>n=458</b> | <b>Survivors<br/>n=352</b> | <b>Non-survivors<br/>n=106</b> | <b>p-value</b> |
|----------------------------------------------|------------------------|----------------------------|--------------------------------|----------------|
| <b>Demographics</b>                          |                        |                            |                                |                |
| Gender – male, number (%)                    | 243 (53.1)             | 180 (51.1)                 | 63 (59.4)                      | 0.15           |
| Age in years, median (IQR)                   | 35 (26-47)             | 33.5 (25-45)               | 40 (30-52)                     | 0.001          |
| Length of stay in days, median (IQR)         | 4 (2-7)                | 5 (2-7)                    | 3 (1-5)                        | <<br>0.0001    |
| <b>Clinical parameters</b>                   |                        |                            |                                |                |
| Systolic blood pressure, mmHg, median (IQR), | 110 (97-122)           | 111 (98-121)               | 110 (91.5-129)                 | 0.37           |
| Heart rate, beats/min, median (IQR),         | 101 (86-118)           | 101 (86-117)               | 102 (87-123)                   | 0.46           |
| Respiratory rate, breaths/min, median (IQR), | 28 (20-32)             | 28 (24-37.75)              | 27 (20-32)                     | 0.002          |
| Glasgow Coma Scale <15, number (%)           | 15 (14-15)             | 15 (15-15)                 | 14 (8-15)                      | <<br>0.0001    |
| HIV infection, Number(%) <sup>b</sup>        | 213 (53.7)             | 163 (53.4)                 | 50 (54.3)                      | 0.91           |
| <b>Risk stratification scores</b>            |                        |                            |                                |                |
| qSOFA, median (IQR)                          | 2 (1-2)                | 1 (1-1)                    | 2 (1-2)                        | <<br>0.0001    |
| qSOFA ≥2, number (%)                         | 188 (41)               | 112 (31.8)                 | 76 (71.7)                      | <<br>0.0001    |

Part of the data in this table has been previously published.<sup>1</sup>

Abbreviations: IQR: inter quartile range, qSOFA : quick Sequential Organ Failure Assessment.

#### Reference List

1. Huson MAM, Katete C, Chunda L, Ngoma J, Wallrauch C, Heller T, van der Poll T, Grobusch MP, 2017. Application of the qSOFA score to predict mortality in patients with suspected infection in a resource-limited setting in Malawi. *Infection* 45: 893-896.
